# Supplementary material
Source: PubMed Central journal article supplement (PMC5125837)

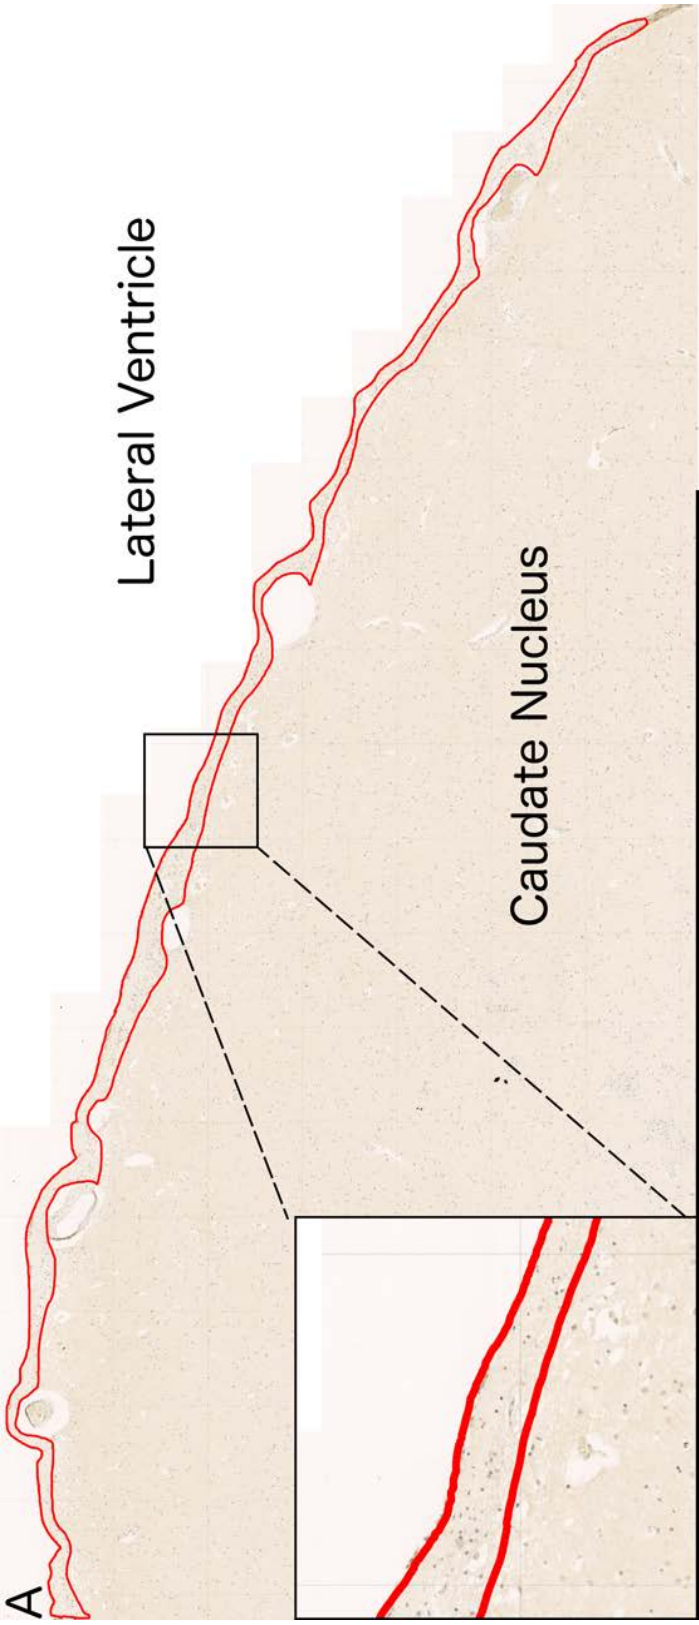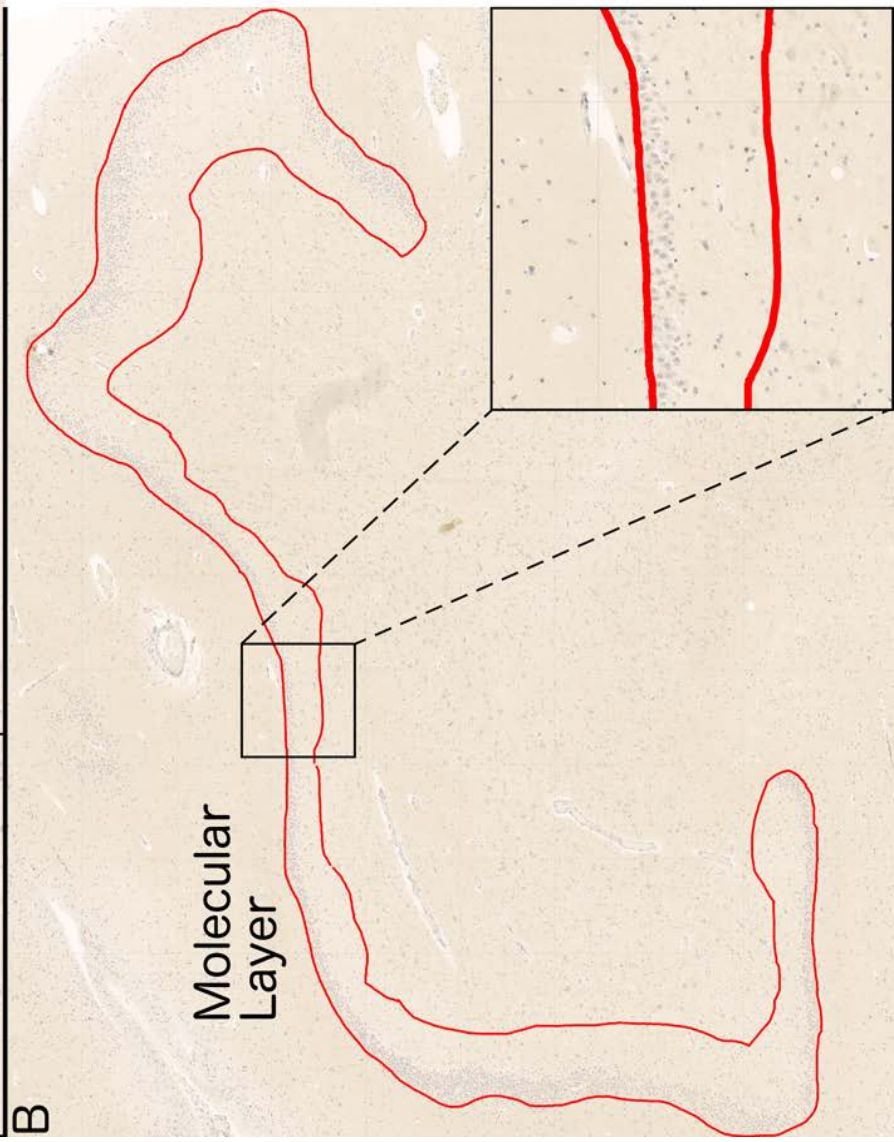

Supplement: NIHMS804377-supplement-Supp_Fig_S1.pdf [file NIHMS804377-supplement-Supp_Fig_S1.pdf]
